# Supplementary material for: Seasonal Evolution of the Chemical Composition of Atmospheric Aerosol in Terra Nova Bay (Antarctica)
Source: MDPI journal article supplement (doi:10.3390/atmos12081030), 2021-08-11
Supplement: s1 [file s1]

# Seasonal Evolution of the Chemical Composition of Atmospheric Aerosol in Terra Nova Bay (Antarctica)

Flavio Vagnoni <sup>1</sup>, Silvia Illuminati <sup>1,\*</sup>, Anna Annibaldi <sup>1,\*</sup>, Francesco Memmola <sup>1</sup>, Giada Giglione <sup>1</sup>, Anna Maria Falgiani <sup>1,2</sup>, Federico Girolametti <sup>1</sup>, Matteo Fanelli <sup>1</sup>, Giuseppe Scarponi <sup>1</sup> and Cristina Truzzi <sup>1</sup>

<sup>1</sup> Department of Life and Environmental Sciences, Università Politecnica delle Marche, Via Brecce Bianche, 60131 Ancona, Italy; f.vagnoni@univpm.it (F.V.); f.memmola@univpm.it (F.M.); g.giglione@pm.univpm.it (G.G.); annamaria.falgiani@ambiente.marche.it (A.M.F.); f.girolamenti@pm.univpm.it (F.G.); matteo.fanelli@virgilio.it (M.F.); g.scarponi@univpm.it (G.S.); c.truzzi@univpm.it (C.T.)

<sup>2</sup> Regional Agency for Environmental Protection (ARPA), 63100 Ascoli Piceno, Italy

\* Correspondence: s.illuminati@univpm.it (S.I.); a.annibaldi@univpm.it (A.A.); Tel.: +39-071-2204981 (S.I. & A.A.)

**Table S1.** AAS instrumental parameters used for the metal determinations in atmospheric particulate matter.

| Parameter             | Al                | Fe    | Cd             | Cu    | Pb    |
|-----------------------|-------------------|-------|----------------|-------|-------|
| Wavelength (nm)       | 396.2             | 248.3 | 228.8          | 327.4 | 283.3 |
| Lamp current (mA)     | 10                | 10    | 5              | 4     | 5     |
| Slit Width            | 0.5               | 0.2   | 0.5            | 0.5   | 0.5   |
| Background correction | Zeeman effect     |       |                |       |       |
| Calibration mode      | Calibration curve |       | Std. additions |       |       |

**Table S2.** Blank values obtained analyzing the field blank filters for Al, Fe, Cd, Cu and Pb.

| Field blank filter | Metal concentrations (mean $\pm$ SD), $\mu\text{g L}^{-1}$ |                |                   |                 |                   |
|--------------------|------------------------------------------------------------|----------------|-------------------|-----------------|-------------------|
|                    | Al                                                         | Fe             | Cd                | Cu              | Pb                |
| Soluble fraction   | 15 $\pm$ 2                                                 | 6.5 $\pm$ 0.5  | 0.128 $\pm$ 0.002 | 0.83 $\pm$ 0.11 | 0.082 $\pm$ 0.003 |
| Insoluble fraction | 205 $\pm$ 14                                               | 1687 $\pm$ 129 | 0.203 $\pm$ 0.002 | 4.7 $\pm$ 0.3   | 1.8 $\pm$ 0.1     |
| Total measured     | 320 $\pm$ 12                                               | 542 $\pm$ 22   | 0.201 $\pm$ 0.011 | 7.6 $\pm$ 0.2   | 2.6 $\pm$ 0.3     |

**Table S3.** Atmospheric concentrations of the studied metals (Al, Fe, Cd, Cu and Pb) as sum of different metal fractions (soluble + insoluble fractions) and as direct measurement at Faraglione Camp during the austral summer 2013–2014. Concentrations are referred to standard air (298 K, 1013 hPa).

| Sampling Period                                 | Standard Air<br>Volume (m <sup>3</sup> ) | AtmosphericConcentration <sup>a</sup> |                            |                            |                            |                            |
|-------------------------------------------------|------------------------------------------|---------------------------------------|----------------------------|----------------------------|----------------------------|----------------------------|
|                                                 |                                          | Al<br>(ngm <sup>-3</sup> )            | Fe<br>(ngm <sup>-3</sup> ) | Cd<br>(pgm <sup>-3</sup> ) | Cu<br>(pgm <sup>-3</sup> ) | Pb<br>(pgm <sup>-3</sup> ) |
| Computed total PM10 from chemical fractionation |                                          |                                       |                            |                            |                            |                            |
| 01/12/13-12/12/13                               | 18,202                                   | 26 ± 3                                | 27 ± 3                     | 0.709 ± 0.12               | 30 ± 3                     | 9.5 ± 1.3                  |
| 12/12/13-22/12/13                               | 16,096                                   | 20 ± 3                                | 20 ± 3                     | 1.1 ± 0.2                  | 42 ± 6                     | 21 ± 3                     |
| 22/12/13-03/01/14                               | 19,359                                   | 23 ± 3                                | 25 ± 3                     | 2.0 ± 0.4                  | 57 ± 6                     | 15 ± 2                     |
| 03/01/14-13/01/14                               | 16,180                                   | 29 ± 4                                | 21 ± 3                     | 0.56 ± 0.12                | 55 ± 5                     | 22 ± 3                     |
| 13/01/14-23/01/14                               | 16,189                                   | 25 ± 3                                | 29 ± 4                     | 0.82 ± 0.27                | 39 ± 4                     | 15 ± 2                     |
| 23/01/14-02/02/14                               | 16,230                                   | 25 ± 2                                | 16 ± 2                     | 3.2 ± 0.9*                 | 41 ± 4                     | 10 ± 1                     |
| Measured total PM10                             |                                          |                                       |                            |                            |                            |                            |
| 01/12/13-12/12/13                               | 18,202                                   | 19 ± 2                                | 21 ± 2                     | 0.75 ± 0.10                | 28 ± 4                     | 11 ± 2                     |
| 12/12/13-22/12/13                               | 16,096                                   | 20 ± 2                                | 21 ± 2                     | 1.0 ± 0.2                  | 48 ± 8                     | 21 ± 3                     |
| 22/12/13-03/01/14                               | 19,359                                   | 23 ± 2                                | 24 ± 3                     | 4.9 ± 0.9*                 | 57 ± 7                     | 14 ± 2                     |

|                   |        |        |        |             |        |        |
|-------------------|--------|--------|--------|-------------|--------|--------|
| 03/01/14-13/01/14 | 16,180 | 26 ± 3 | 24 ± 3 | 0.49 ± 0.09 | 48 ± 6 | 22 ± 3 |
| 13/01/14-23/01/14 | 16,189 | 25 ± 3 | 25 ± 3 | 0.69 ± 0.10 | 28 ± 4 | 15 ± 2 |
| 23/01/14-02/02/14 | 16,230 | 19 ± 2 | 18 ± 2 | 0.69 ± 0.12 | 40 ± 6 | 10 ± 2 |

<sup>a</sup> ± SD computed as the square root of the sum of variances. \*anomalous values
